# Supplementary figures and images for: Evaluating the Quality and Reliability of Gender-affirming Surgery Videos on YouTube and TikTok
Source: PubMed Central journal article supplement — Plast Reconstr Surg Glob Open. 2022 Jul 28;10(7):e4443. doi: 10.1097/GOX.0000000000004443 (PMC9333518; doi:10.1097/gox.0000000000004443), 2022-07-28

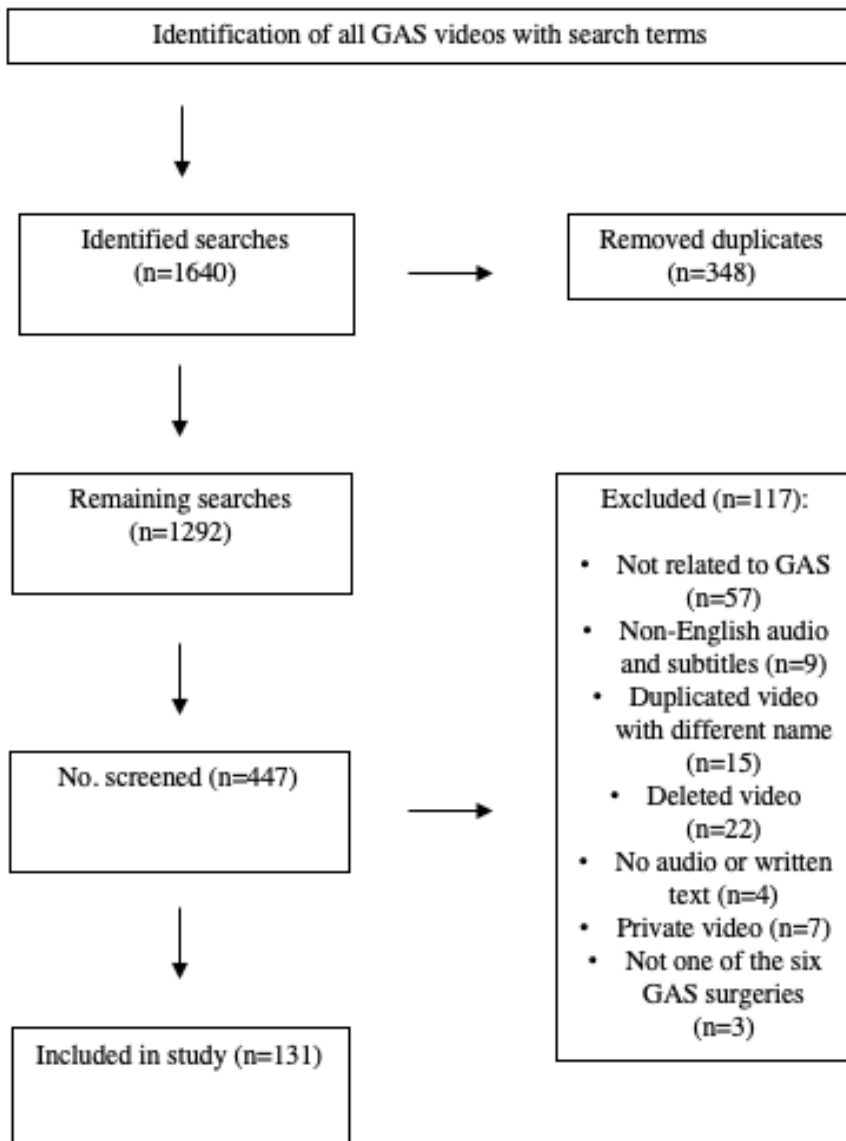

Supplement: gox-10-e4443-s001.pdf [file gox-10-e4443-s001.pdf]

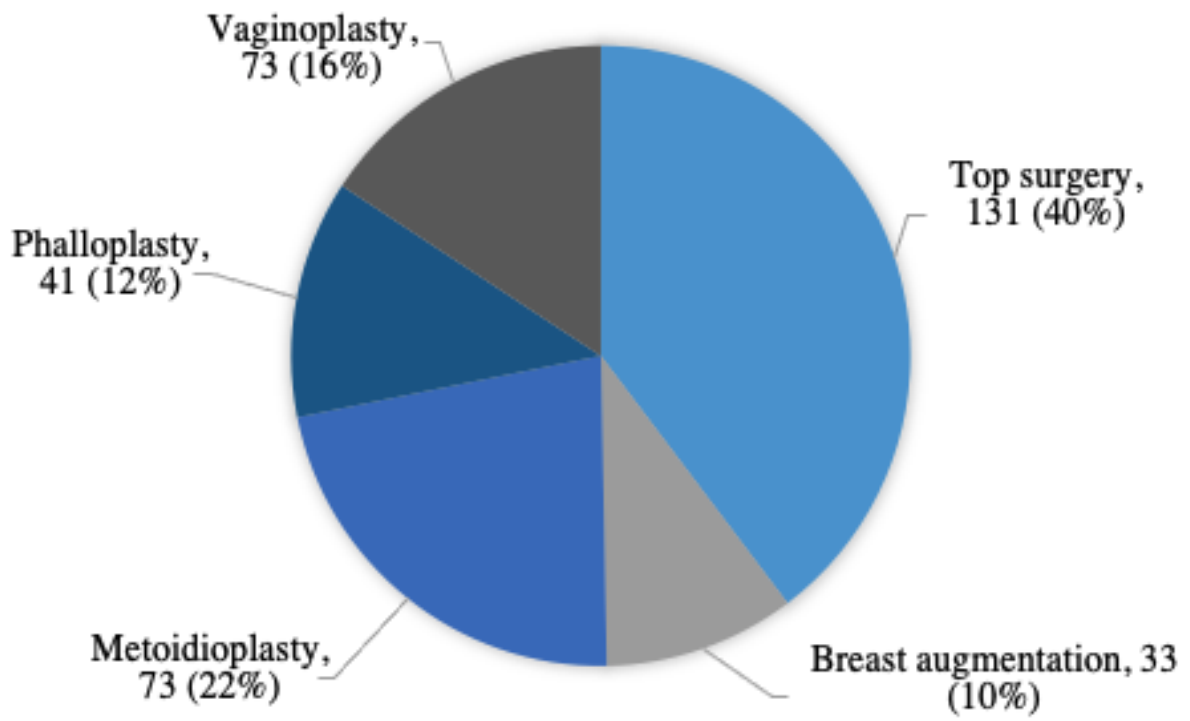

Supplement: gox-10-e4443-s002.pdf [file gox-10-e4443-s002.pdf]

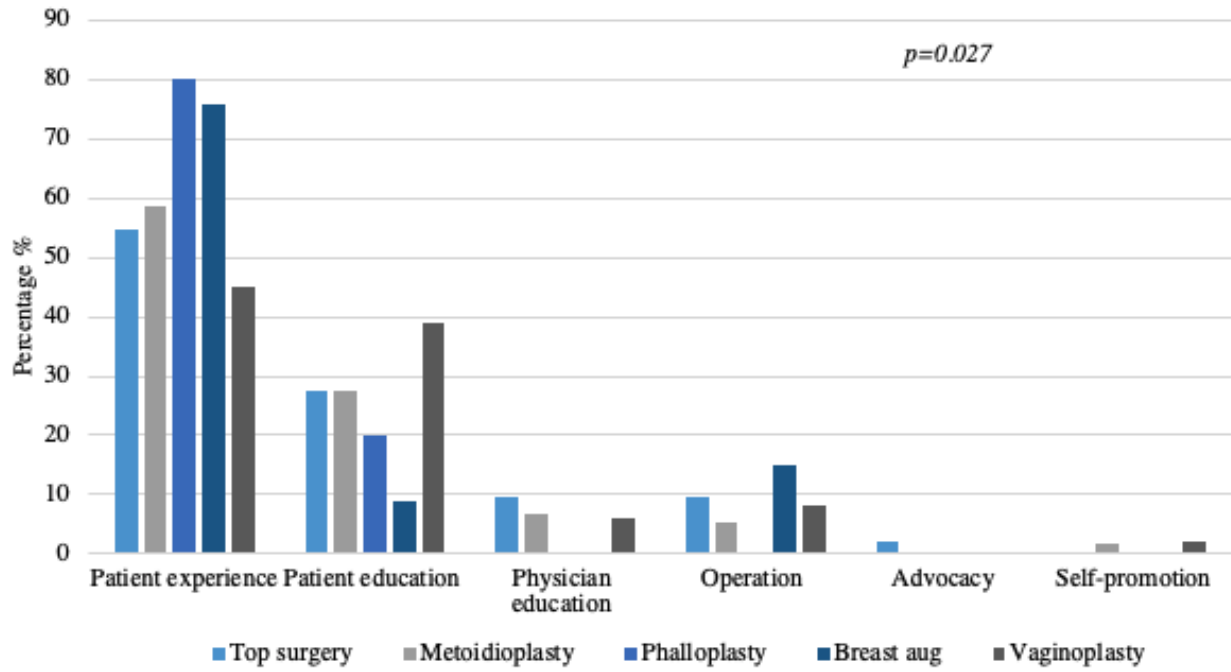

Supplement: gox-10-e4443-s003.pdf [file gox-10-e4443-s003.pdf]

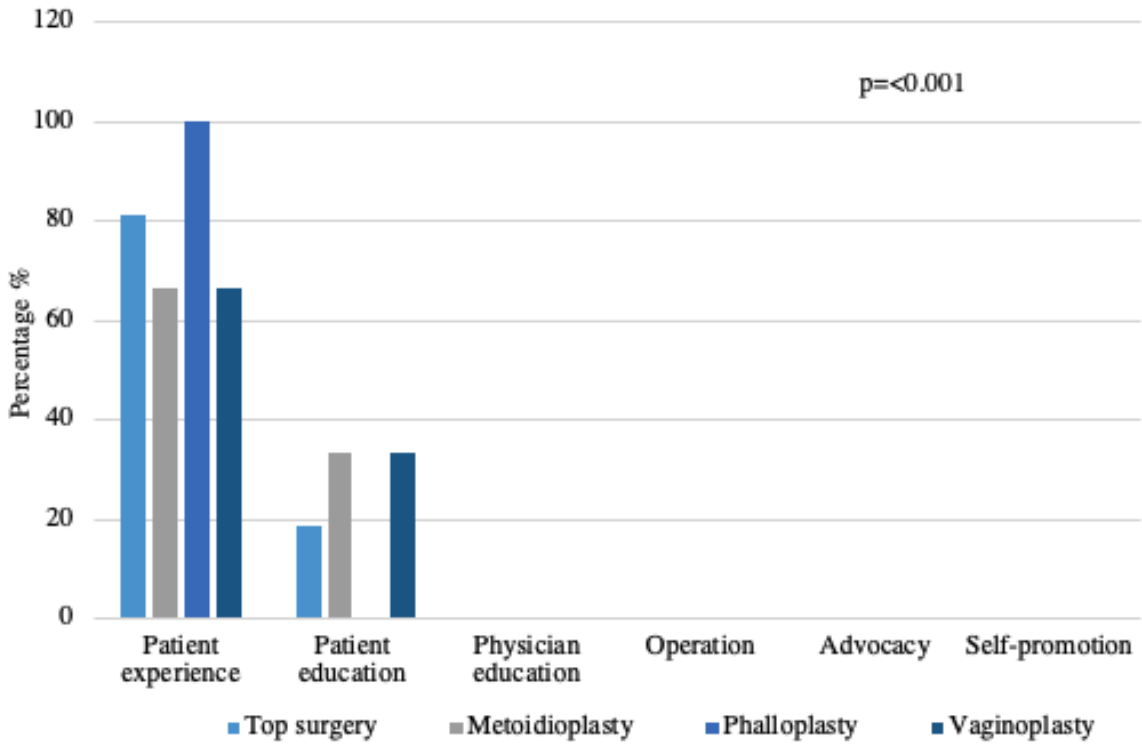

Supplement: gox-10-e4443-s004.pdf [file gox-10-e4443-s004.pdf]

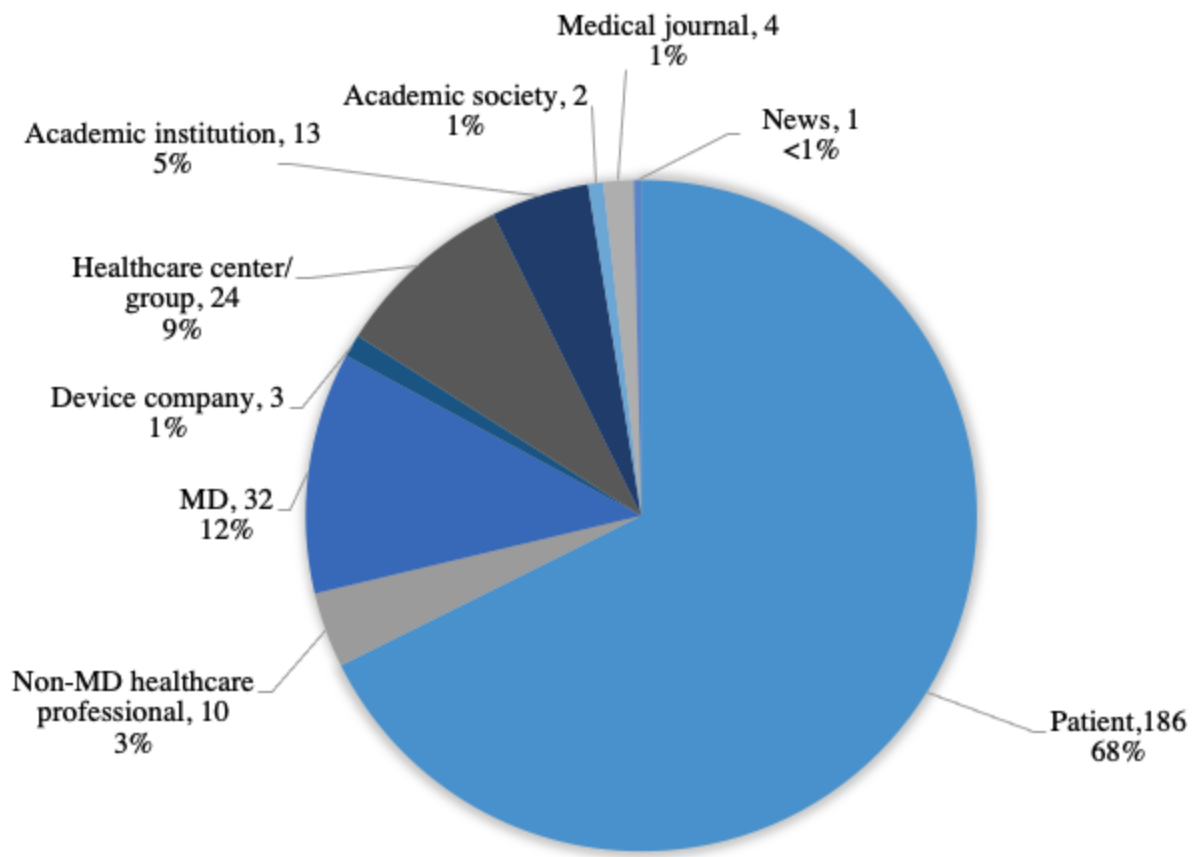

Supplement: gox-10-e4443-s005.pdf [file gox-10-e4443-s005.pdf]

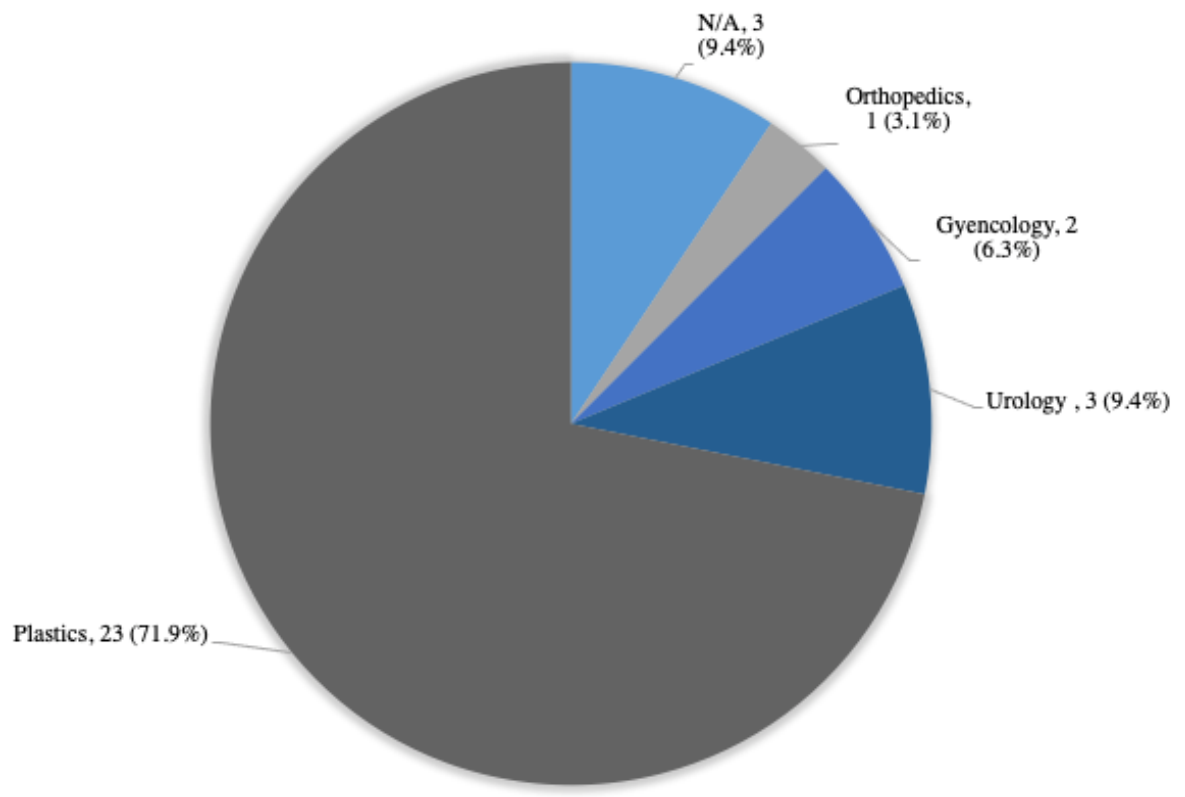

Supplement: gox-10-e4443-s006.pdf [file gox-10-e4443-s006.pdf]
